# Supplementary material for: Facile synthesis of mesoporous MOF/silica composites
Source: Royal Society of Chemistry journal article supplement (doi:10.1039/c4ra09626f), 2014-10-29
Supplement: c4ra09626f1.pdf [file c4ra09626f1.pdf]

## Facile synthesis of mesoporous MOF/silica composites

Xinlong Yan<sup>\*a</sup>, Xiaoyan Hu<sup>a</sup> and Sridhar Komarneni<sup>b</sup>

<sup>a</sup> School of Chemical Engineering & Technology, China University of Mining and Technology,  
XuZhou 221116, P. R.China

<sup>b</sup> Materials Research Institute, The Pennsylvania State University, University Park, PA 16802,  
USA

\*Corresponding Author, E-mail: yanxl@cumt.edu.cn

### Experimental

#### Materials

Cu(NO<sub>3</sub>)<sub>2</sub>·3H<sub>2</sub>O, cetyltrimethylammonium bromide (CTAB), tetraethoxysilane (TEOS), 1,3,5-Benzenetricarboxylic acid (H<sub>3</sub>BTC) and ethanol were supplied by Sinoreagent. All solvents and chemicals are of analytical reagents and were used without further purification.

#### Characterization

The powder XRD patterns of all the samples were recorded on a Bruker D8 ADVANCE diffractometer with Cu K $\alpha$  radiation at 40 KV and 30 mA. The N<sub>2</sub> adsorption-desorption isotherms were collected at 77 K using Micromeritics ASAP 2460 porosimeter. Prior to the measurement, the samples were degassed at 423 K overnight. The total pore volume (V<sub>t</sub>) was determined as the volume of liquid nitrogen adsorbed at a relative pressure of 0.99. The pore size distributions were obtained using BJH methods from the desorption branch. The micropore volume (V<sub>micro</sub>) was estimated using t-plot method and mesopore volumes were obtained by subtracting V<sub>micro</sub> from the total pore volume. Scanning Electron Microscope (SEM) pictures were taken by a FEI Quanta 250 FEG device and elemental mapping was performed using an EDX Bruker Quantax 400. Transmission Electron Microscope (TEM) pictures were obtained using a FEI Tecnai G2 F20 device operated at 200 KV. XPS were recorded performed using a Thermo Scientific Escalab 250Xi instrument equipped with Al K $\alpha$  radiation (h $\nu$ =1486.6eV). Binding energies for the high-resolution spectra were calibrated by setting C 1s at 284.8 eV. Thermal gravimetric

analysis (TGA) measurements were performed on a DSC 8000 Series Perkin Elmer thermal analysis system. Samples were heated in a continuous-flow of N<sub>2</sub> gas with a ramp rate of 10 °C/min from 30 up to 800 °C.

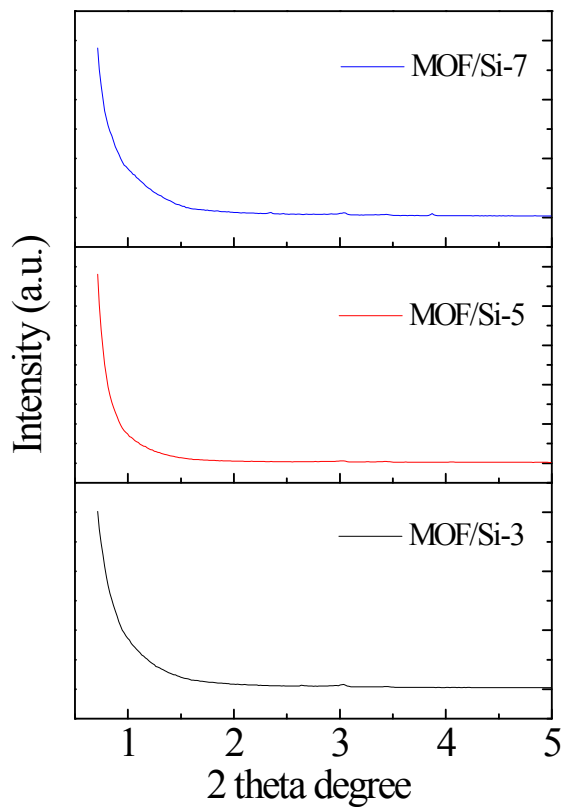

Figure S1. Small-angle XRD patterns of samples (a) MOF/Si-3; (b) MOF/Si-5; (c) MOF/Si-7

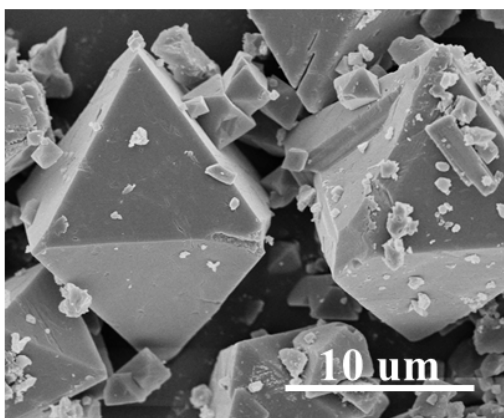

Figure S2. SEM image of pure HKUST-1

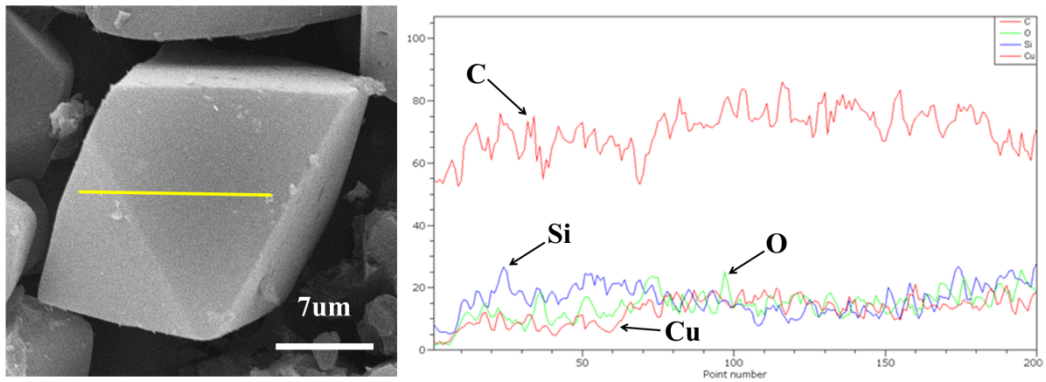

Figure S3. SEM image and corresponding line scans of MOF/Si-5 sample.

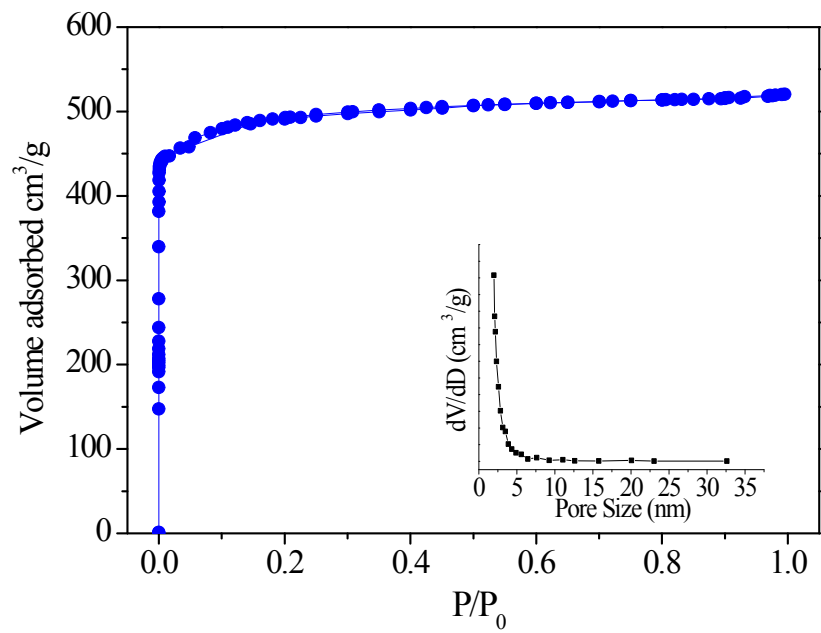

Figure S4. Nitrogen adsorption-desorption isotherms and mesopore size distributions (inserted) of pure HKUST-1

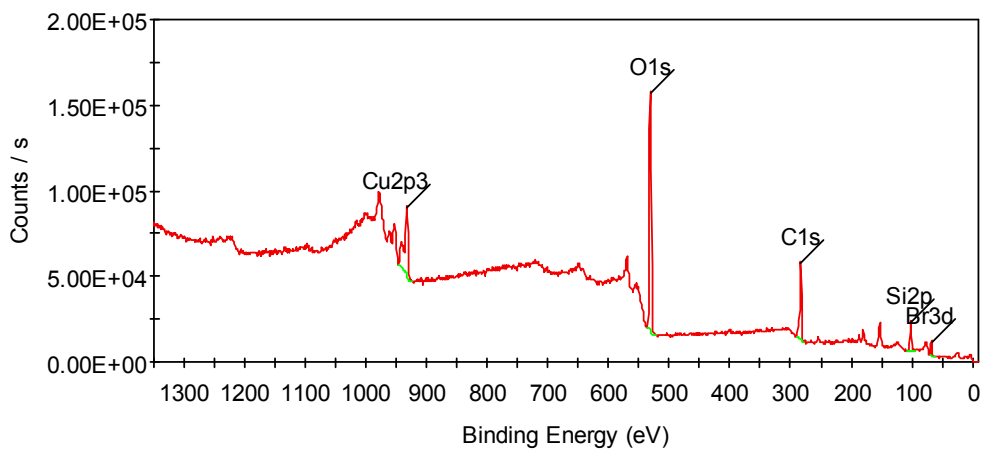

Figure S5. Survey XPS spectra of MOF/Si-5 sample

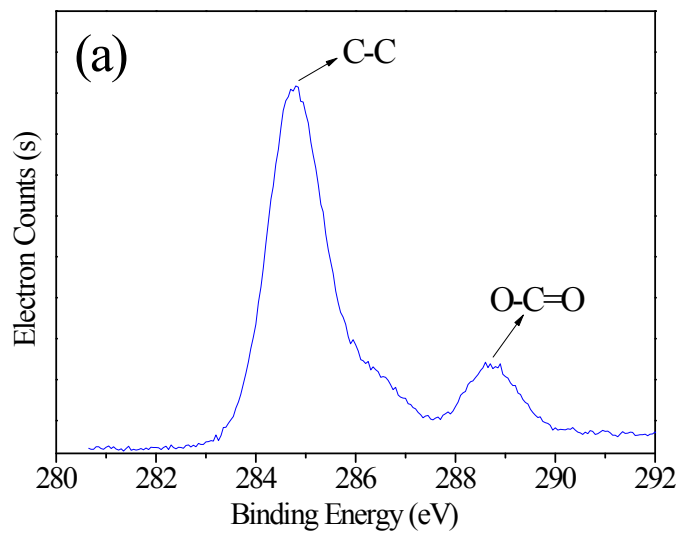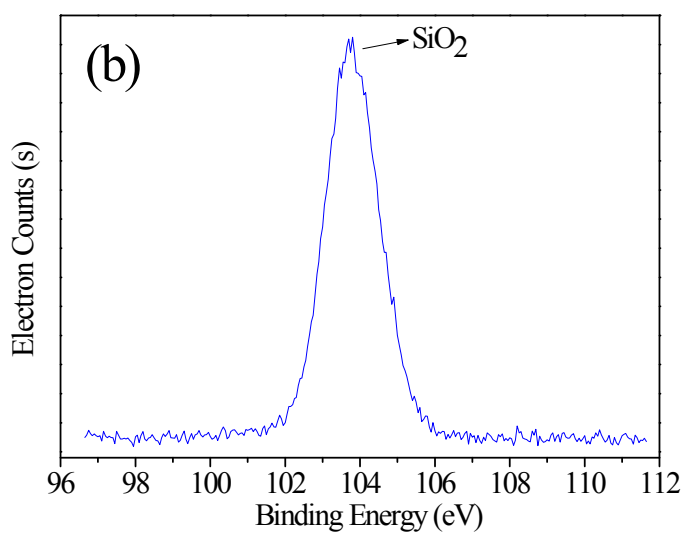

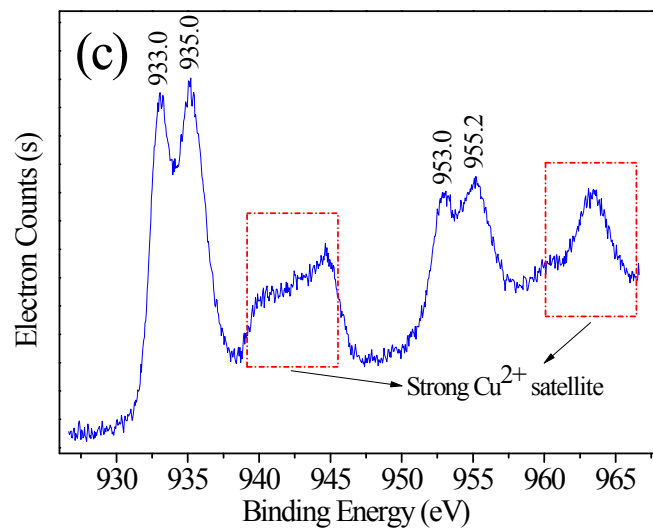

Figure S6. XPS spectra in the C1s region(a), Si 2p region(b) and Cu 2p region(c) for MOF/Si-5 sample

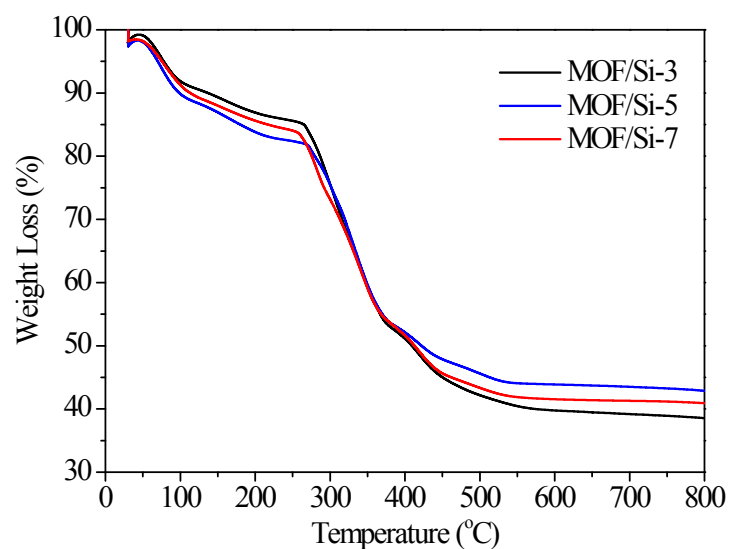

Figure S7. TGA curves of the as-synthesized samples.
